# Supplementary material for: Molecular Characterization and Geographic Distribution of a Mymonavirus in the Population of Botrytis cinerea
Source: PubMed Central journal article supplement (PMC6116283; doi:10.3390/v10080432), 2018-08-15
Supplement: viruses-10-00432-s001.pdf [file viruses-10-00432-s001.pdf]

Figure S1.

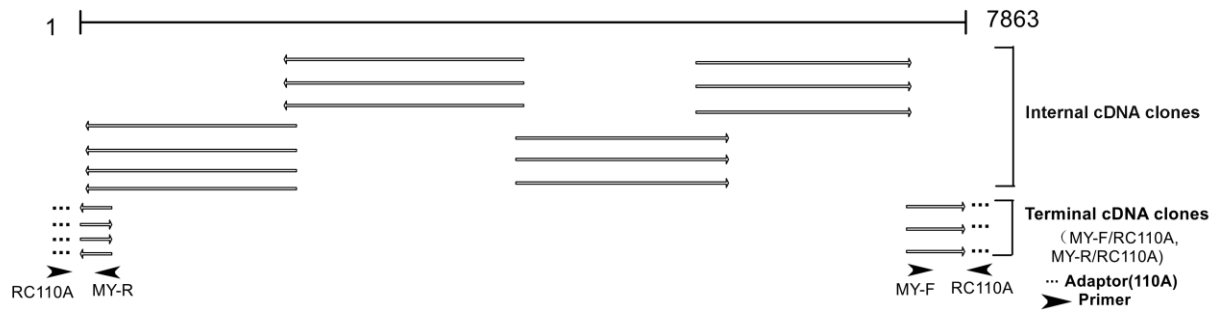

Figure S2.

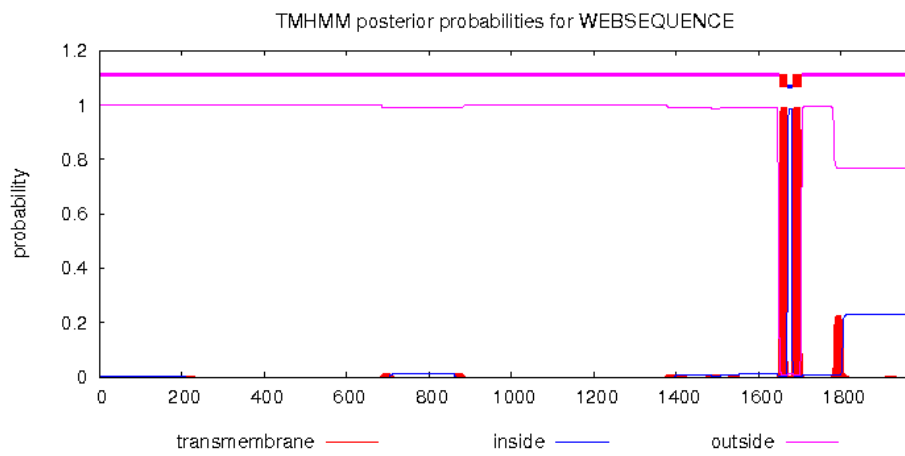

**Table S1.** Oligonucleotide primers/adaptor used in this study.

| Name                 | Sequence (5' → 3')      | Position <sup>1</sup>             | Polarity <sup>2</sup> |
|----------------------|-------------------------|-----------------------------------|-----------------------|
| for cDNA cloning     |                         |                                   |                       |
| MY-1F                | ATTGTCTACCCGCGACGTAA    | 45-64                             | +                     |
| MY-1R                | ACGGTGGTGTGCCTCATA      | 1914-1932                         | -                     |
| MY-2F                | ACGGAGACCAAGCAACGACTC   | 1820-1840                         | +                     |
| MY-2R                | GGAGGATCGCAAACCACGG     | 3936-3954                         | -                     |
| MY-3F                | TAATGCCTCAATAGGCTTCG    | 3880-3899                         | +                     |
| MY-3R                | TCAGGGCGTCATTGCGTAGT    | 5758-5774                         | -                     |
| MY-4F                | CTATGTTCGCTTACGACGCA    | 5475-5494                         | +                     |
| MY-4R                | ATTCGGGACCTTGATCGGTG    | 7370-7389                         | -                     |
| MY-F                 | TGAGCATGGAGAGACAGAT     | 7340-7358                         | +                     |
| MY-R                 | AACGCGTTTACTCGAGGAGG    | 278-297                           | -                     |
| 110 (3'-adaptor)     | TATCTTATCGGCGTGTCCCC    | to 3'-end of dsRNA                | +/-                   |
| RC110A (primer)      | GGGGGACACGCCGATAAGATA   | complementary to the adaptor 110A | -/+                   |
| for RT-PCR detection |                         |                                   |                       |
| M-RT-F               | TAATGCCTCAATAGGCTTCG    | 3880-3899                         | +                     |
| M-RT-R               | AGATGCTGCAACCGCACCATGCC | 5136-5158                         | -                     |

<sup>1</sup> Positions for the PCR primers or the adaptor in the cDNA of *Botrytis cinerea* mymonavirus 1 (BcMyV1) were labeled in Figure S1.

<sup>2</sup> Polarity refers to the positive strand (+) and the negative strand (-) of BcMyV1.
